# Supplementary material for: A harmonized global land evaporation dataset from model-based products covering 1980–2017
Source: Copernicus journal article supplement (doi:10.5194/essd-13-5879-2021), 2021-12-21
Supplement: Supplementary file 1 [file essd-13-5879-2021-supplement.pdf]

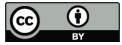

*Supplement of*

## **A harmonized global land evaporation dataset from model-based products covering 1980–2017**

**Jiao Lu et al.**

*Correspondence to:* Guojie Wang (gwang@nuist.edu.cn)

The copyright of individual parts of the supplement might differ from the article licence.

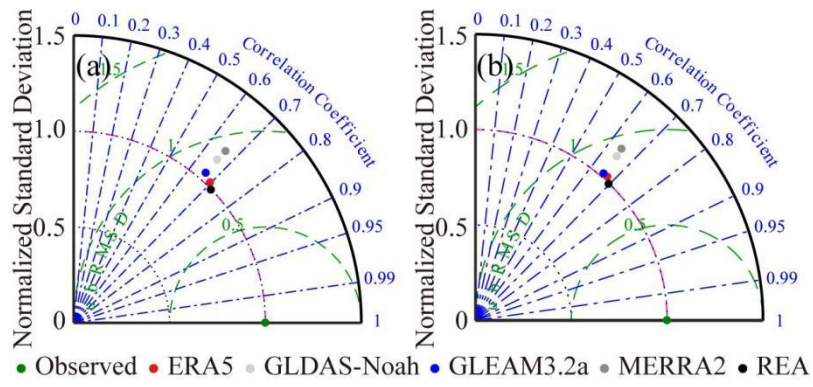

Figure S1. Taylor diagram of daily Ground-measured ET (a) including, (b) excluding days with strong precipitation and ET from different products.

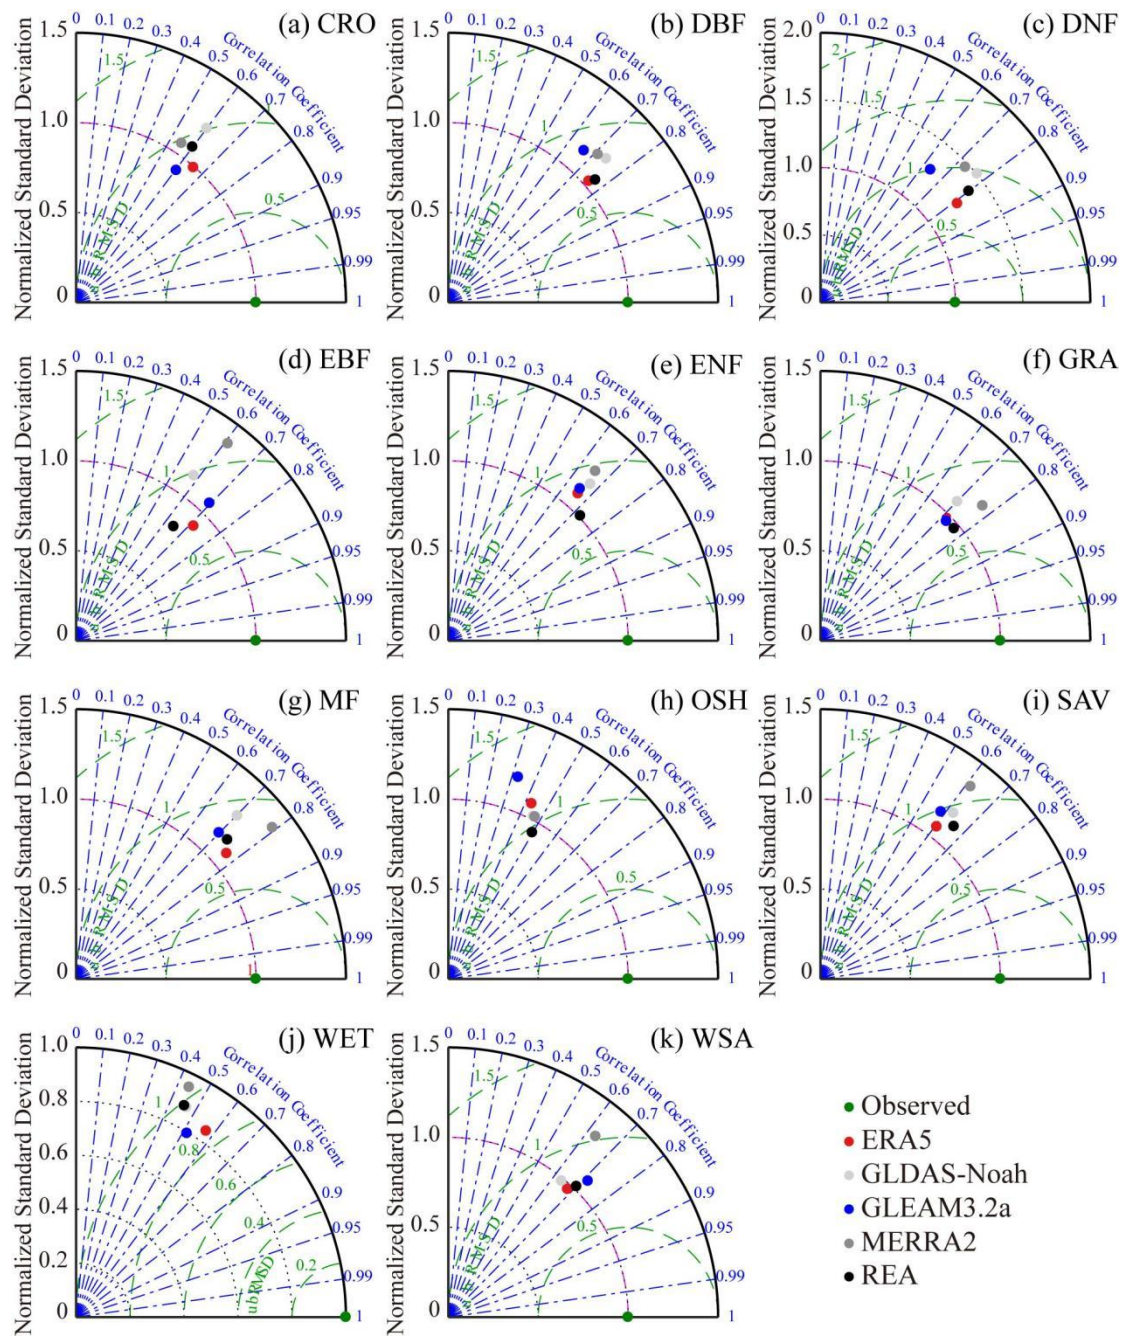

Figure S2. Taylor diagrams of daily Ground-measure ET and ET from different products in different ecosystems.

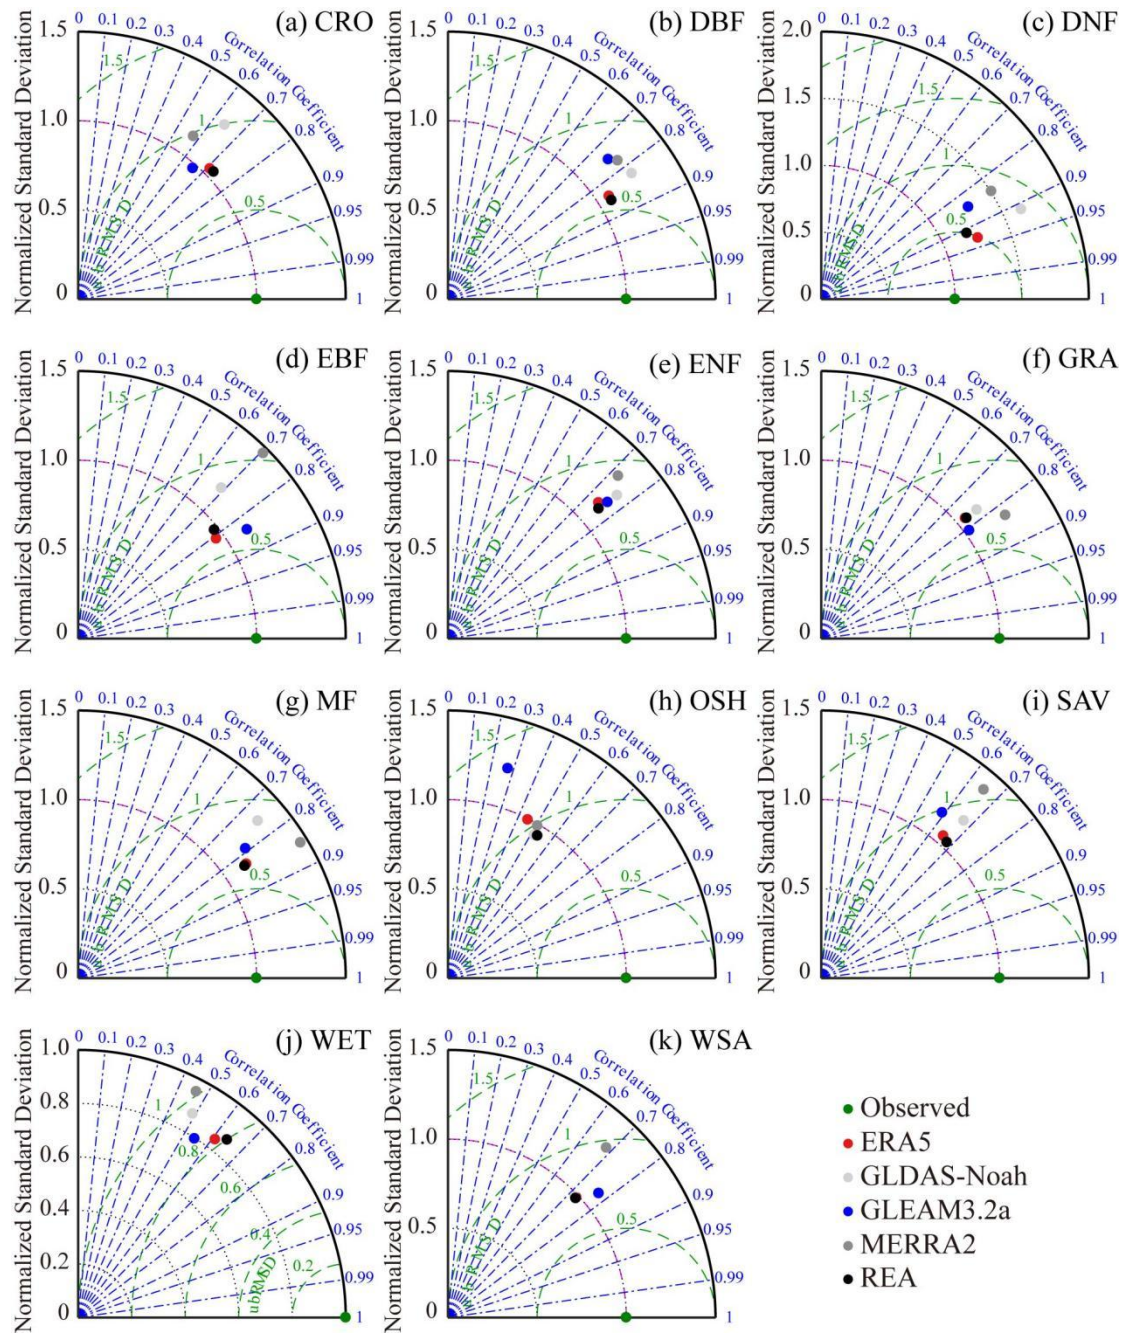

Figure S3. Taylor diagrams of monthly Ground-measure ET and ET from the different products in different ecosystems.

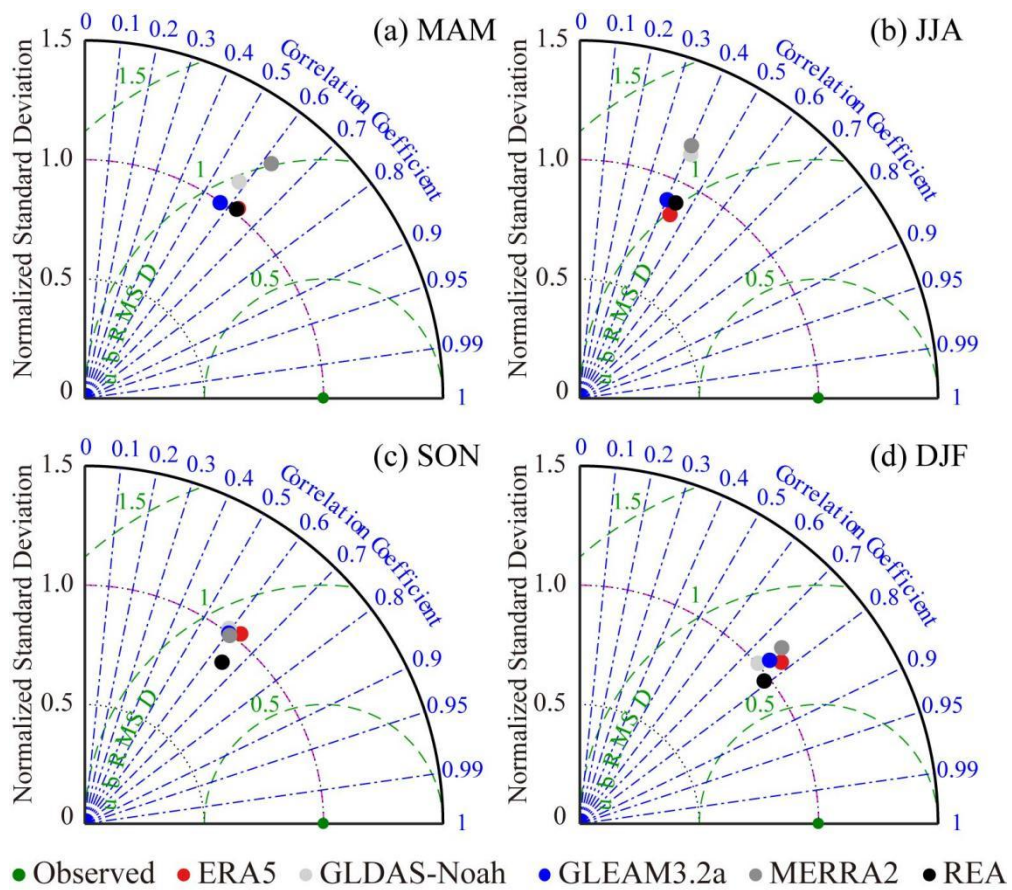

Figure S4. Taylor diagrams of daily Ground-measured ET and ET from different products in different seasons.

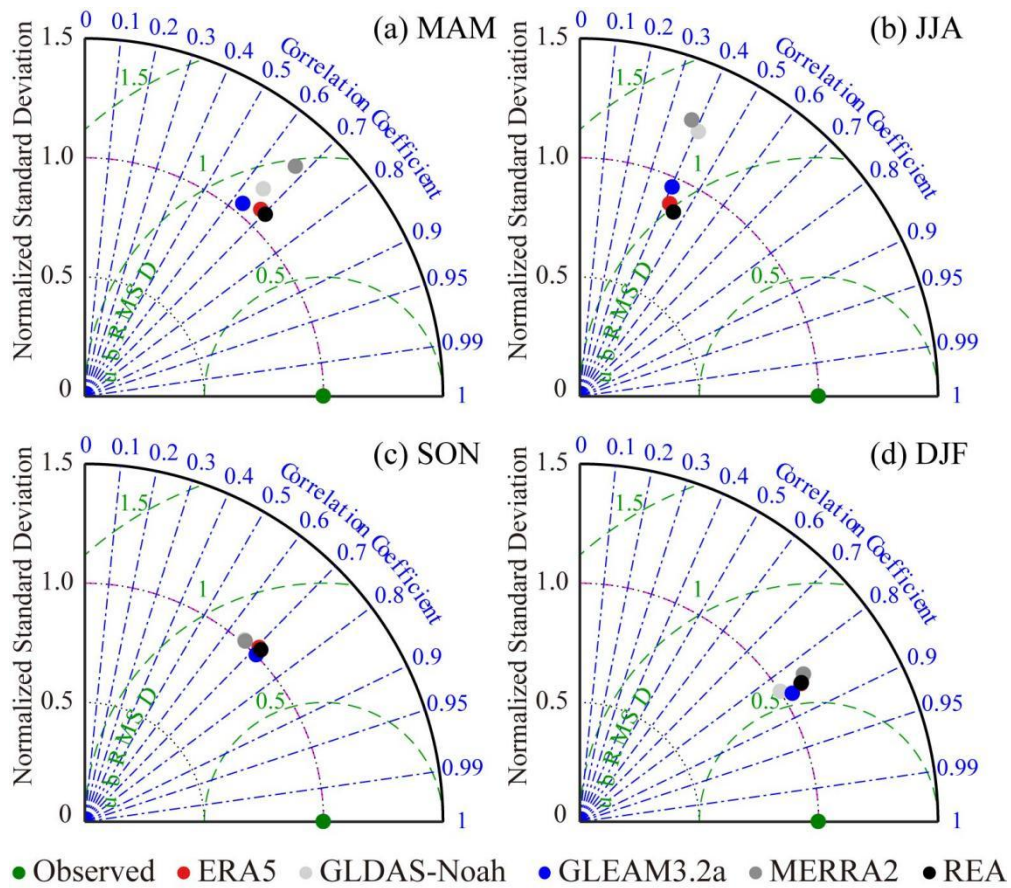

Figure S5. Taylor diagrams of monthly Ground-measured ET and ET from different products in different seasons.

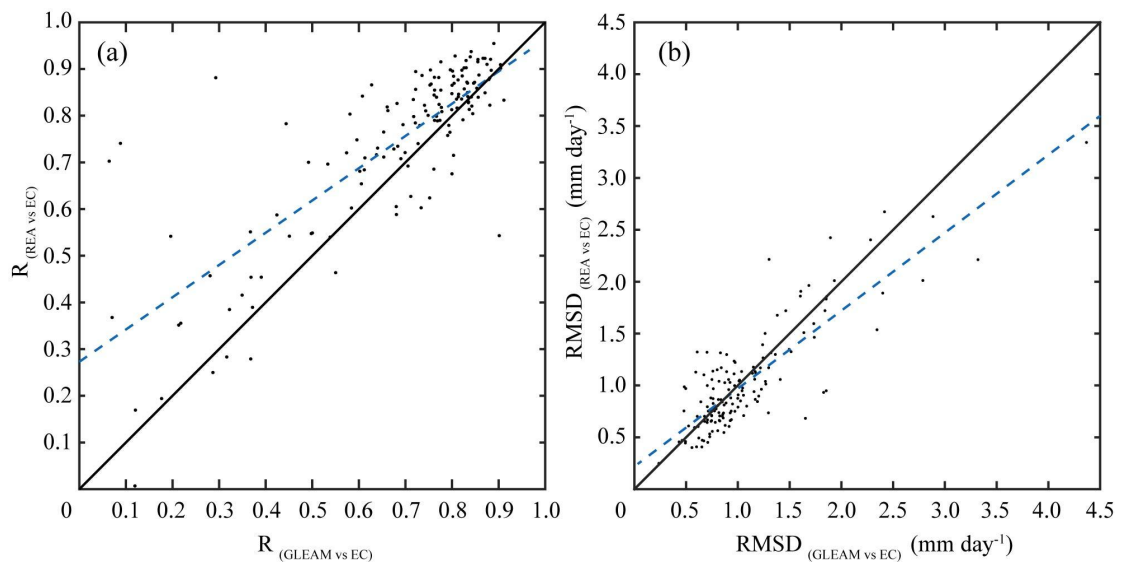

Figure S6. Scatter plots of the correlation coefficients and RMSD between GLEAM, REA and Ground-measured ET. Linear fits are plotted in blue and the 1:1 line is depicted.
